# Supplementary material for: Dopant-Free Hole-Transporting Material Based on Poly(2,7-(9,9-bis(N,N-di-p-methoxylphenylamine)-4-phenyl))-fluorene for High-Performance Air-Processed Inverted Perovskite Solar Cells
Source: MDPI journal article supplement (doi:10.3390/polym15122750), 2023-06-20
Supplement: s1 [file s1]

## Supplementary Information

### **Dopant-Free Hole-Transporting Material Based on Poly(2,7-(9,9-bis(*N,N*-di-*p*-Methoxyphenylamine)-4-phenyl))Fluorene for High-Performance Air-processed Inverted Perovskite Solar Cells**

Baomin Zhao <sup>a,\*</sup>, Meng Tian <sup>a</sup>, Xingsheng Chu <sup>a</sup>, Peng Xu <sup>a</sup>, Jie Yao <sup>a</sup>, Pingping Hou <sup>b</sup>, Zhaoning Li <sup>a</sup> and Hongyan Huang <sup>b,\*</sup>

<sup>a</sup> State Key Laboratory for Organic Electronics and Information Displays & Jiangsu Key Laboratory for Biosensors, Institute of Advanced Materials (IAM), Nanjing University of Posts and Telecommunications, 9 Wenyuan Road, Nanjing 210023, Jiangsu, China

<sup>b</sup> School of Electronic Information, Nanjing Vocational College of Information Technology, 99 Wenyuan Road, Nanjing 210023, Jiangsu, China  
Technology, 99 Wenyuan Road, Nanjing 210023, Jiangsu, China

\*Corresponding authors. E-mail addresses: provost@nwpu.edu.cn (W. Huang)

## NMR and MALDI-ToF spectra

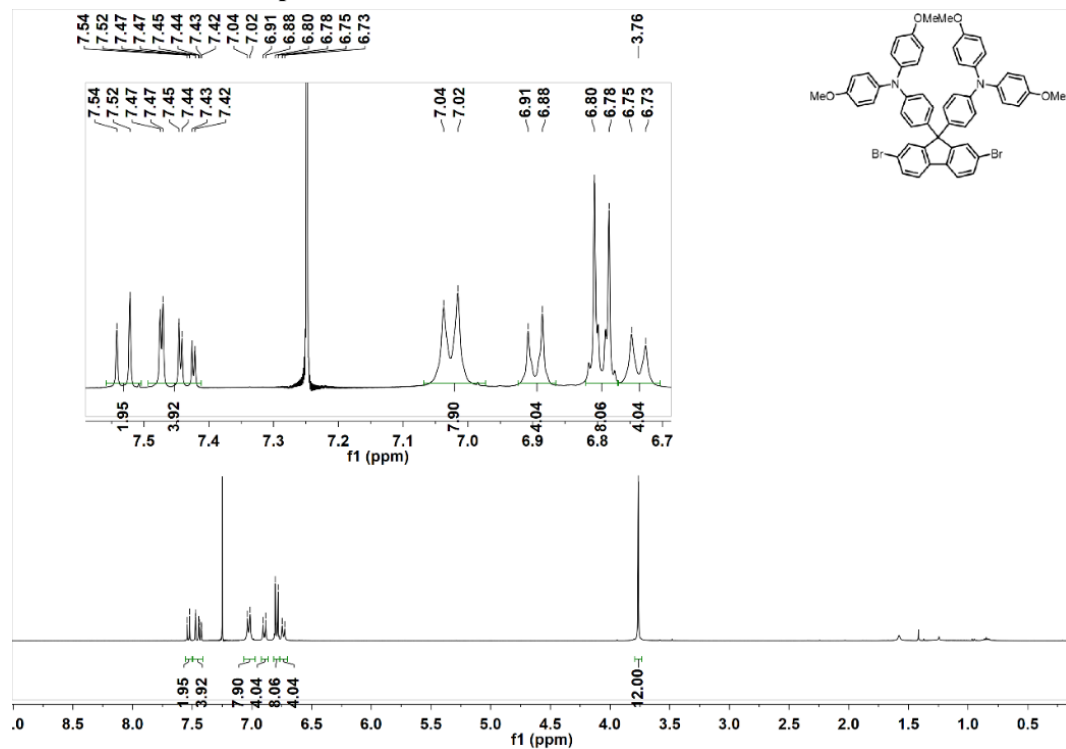

Figure S1 <sup>1</sup>H NMR spectrum of 2BrFTP in CDCl<sub>3</sub>.

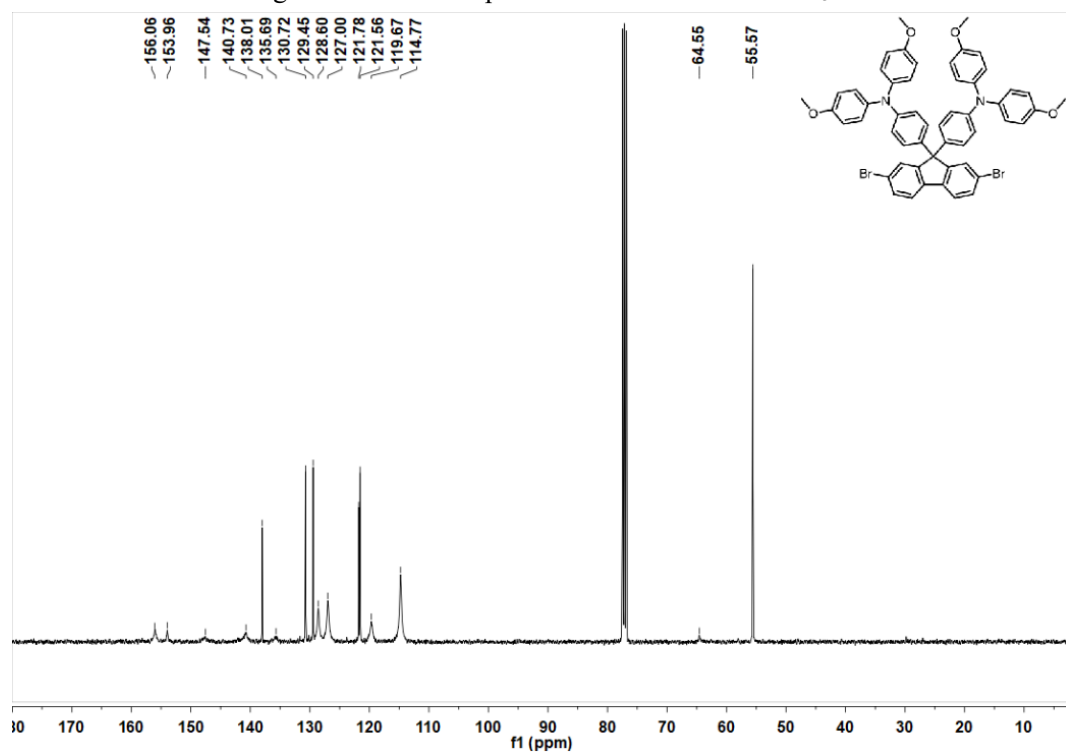

Figure S2 <sup>13</sup>C NMR spectrum of 2BrFTP in CDCl<sub>3</sub>.

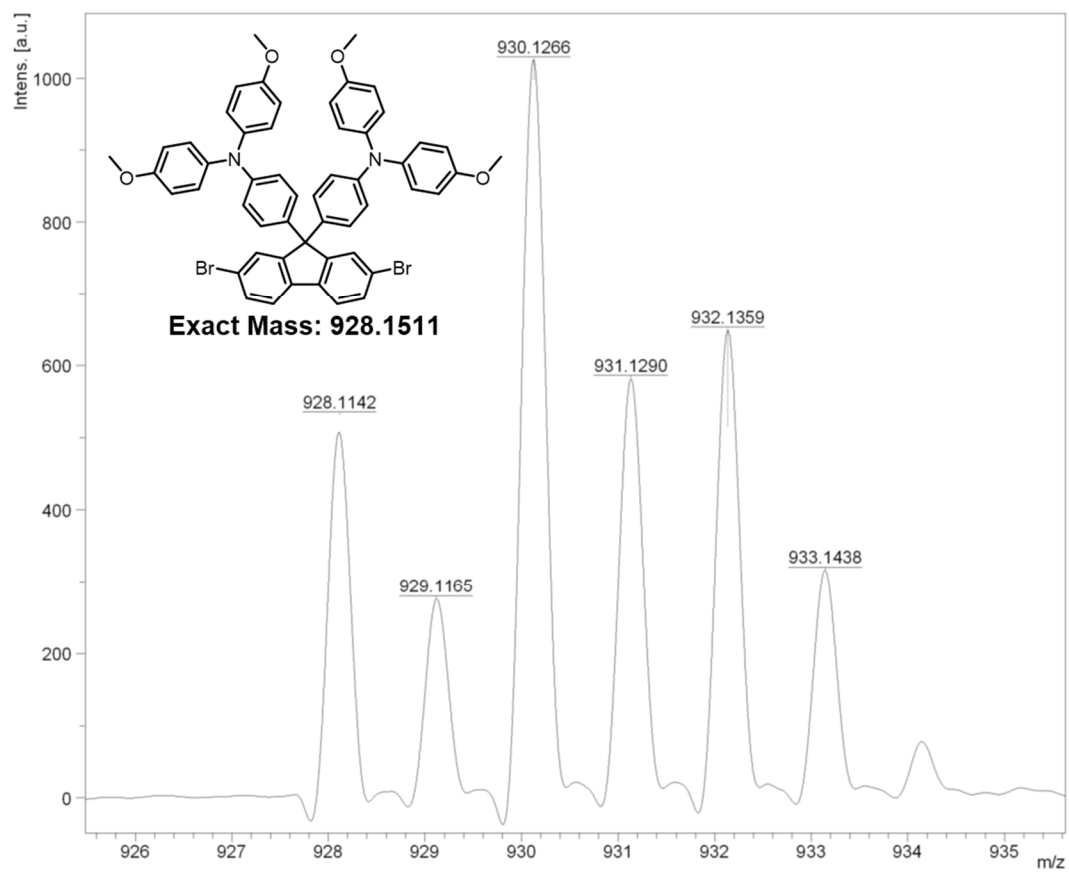

Figure S3 MALDI-TOF MS spectrum of 2BrFTP.

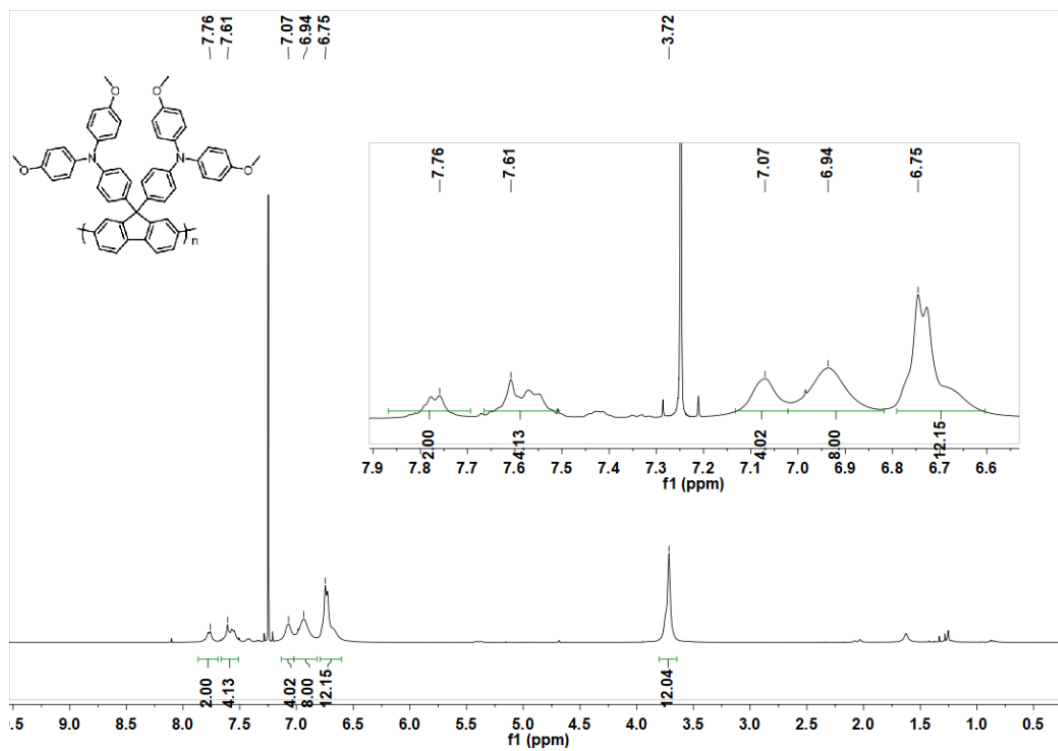

Figure S4  $^1\text{H}$  NMR spectrum of PFTP in  $\text{CDCl}_3$ .

### The cost of PFTPA in this study

**Table S1** The synthetic cost analysis of PFTPA in this study.

|        | Reagent                         | Weight (g<br>or L) | Price (\$/g<br>or L) <sup>a</sup> | Cost<br>(\$) | Cost<br>(\$/g) |
|--------|---------------------------------|--------------------|-----------------------------------|--------------|----------------|
| 2BrFPA | 4,4-dimethoxytriphenylamine     | 10.85              | 1.75                              | 18.98        |                |
|        | 2,7-dibromo-9H-fluoren-9-one    | 1.5                | 0.36                              | 0.54         |                |
|        | Methylsulfonic acid             | 6.0                | 0.028                             | 0.17         |                |
|        | Dichloromethane                 | 0.50               | 1.85                              | 0.93         | 5.35           |
|        | Ethyl acetate                   | 0.3                | 1.22                              | 0.37         |                |
|        | hexane                          | 0.80               | 1.0                               | 0.8          |                |
|        | Na <sub>2</sub> SO <sub>4</sub> | 30                 | 0.0035                            | 0.105        |                |
| PFTPA  | 2BrFPA                          | 0.37               | 5.35                              | 1.98         |                |
|        | bis-(1,5-cyclooctadiene) nickel | 0.13               | 12.25                             | 1.594        |                |
|        | 2,2-Bipyridine                  | 0.076              | 0.39                              | 0.03         |                |
|        | 1,5-cyclooctadiene              | 0.052              | 0.38                              | 0.02         |                |
|        | Bromobenzene                    | 3.2                | 0.05                              | 0.16         |                |
|        | methanol                        | 0.2                | 0.85                              | 0.17         | 16.74          |
|        | HCl (3M)                        | 0.1                | 0.3                               | 0.03         |                |
|        | Toluene                         | 0.05               | 1.15                              | 0.0575       |                |
|        | chloroform                      | 0.02               | 2.4                               | 0.048        |                |
|        | acetone                         | 0.25               | 1.05                              | 0.26         |                |

<sup>a</sup> The price information was obtained from Energy Chemical Technology (Shanghai) Co., Ltd and Shanghai Titan Scientific Co., Ltd.

### DSC

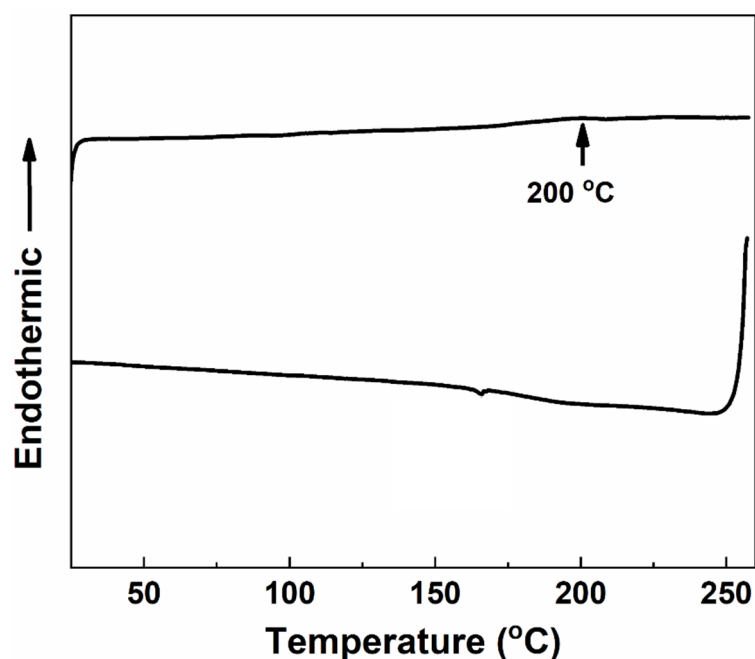

**Figure S5** DSC curves of PFTPA recorded at a heating rate of 10 °C/min and a cooling rate of 20 °C/min.

### CV curve for Ferrocene vs Ag/Ag<sup>+</sup>

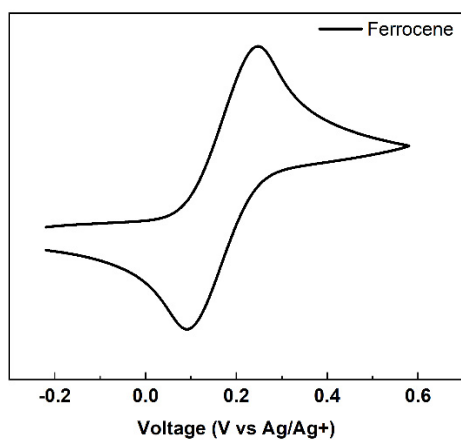

**Figure S6** The cyclic voltammetry (CV) curve of Ferrocene measured with Ag/Ag<sup>+</sup> as the reference electrode in acetonitrile.

### DFT calculation

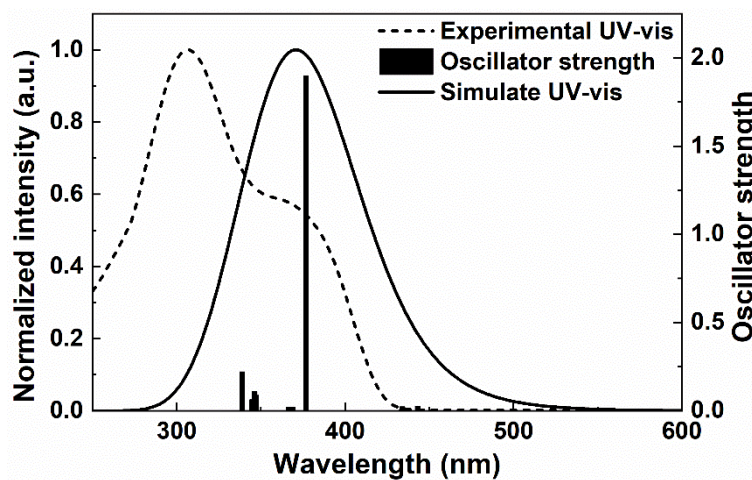

**Figure S7** The overlay of TD-DFT simulation and experimental UV-vis spectra of PFTPA.

**Table S2** The calculation results of TD-DFT

| State | $\lambda/\text{nm}$ | $f$    | Major transitions         | Character          | $\lambda_{\text{exp}}/\text{nm}$ |
|-------|---------------------|--------|---------------------------|--------------------|----------------------------------|
| 2     | 338                 | 0.0270 | H-3 $\rightarrow$ L (49%) | $n\text{-}\pi^*$   | 310                              |
|       |                     |        | H-4 $\rightarrow$ L (39%) |                    |                                  |
| 5     | 376                 | 0.0235 | H-3 $\rightarrow$ L (39%) | $\pi\text{-}\pi^*$ | 370                              |
|       |                     |        | H-4 $\rightarrow$ L (37%) |                    |                                  |

### Device stability

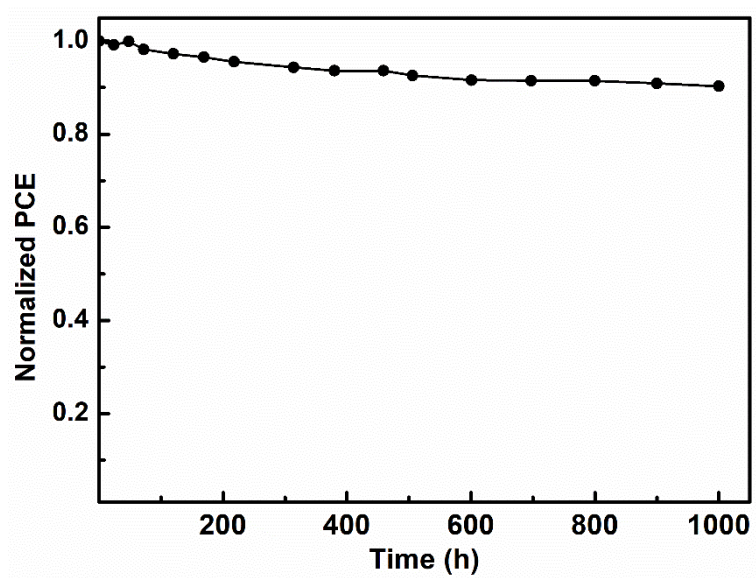

**Figure S8** The longtime device stability of PFTPA-based PSC.

**The contact angle between HTM and DMF.**

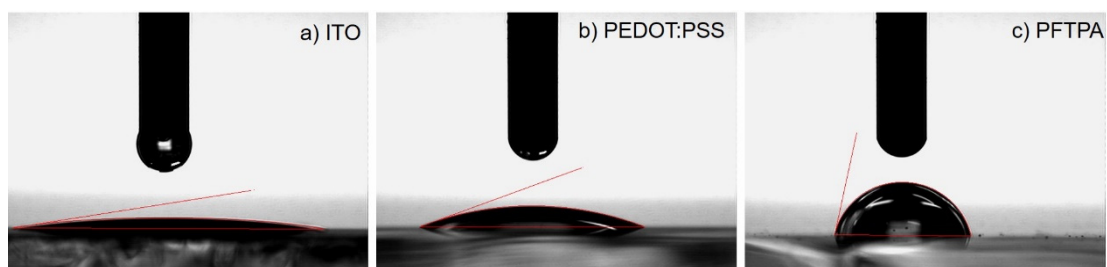

**Figure S9.** The measured contact angles of DMF a) on ITO substrate, b) on PEDOT:PSS substrate and on PFTPA substrate.

### The perovskite crystal size distribution.

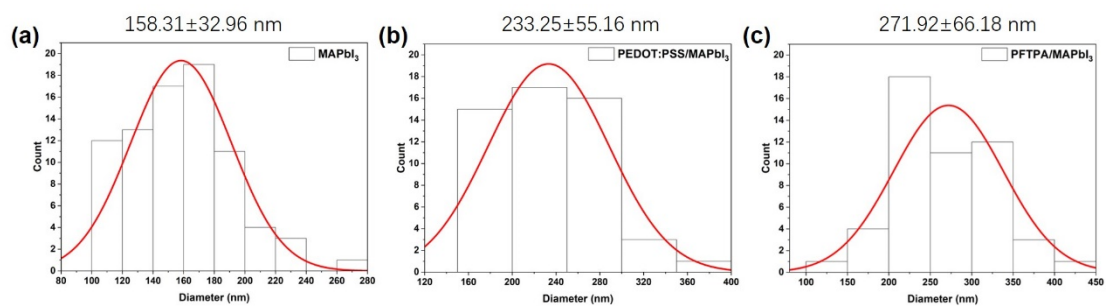

**Figure S10.** The perovskite crystal size distribution, a) MAPbI<sub>3</sub> @ bare ITO substrate, b) MAPbI<sub>3</sub>@PEDOT:PSS/ITO substrate and c) MAPbI<sub>3</sub>@PFTPA/ITO substrate, estimated according to the statistical data deduced from the SEM images shown in Figure 4.



## AFM

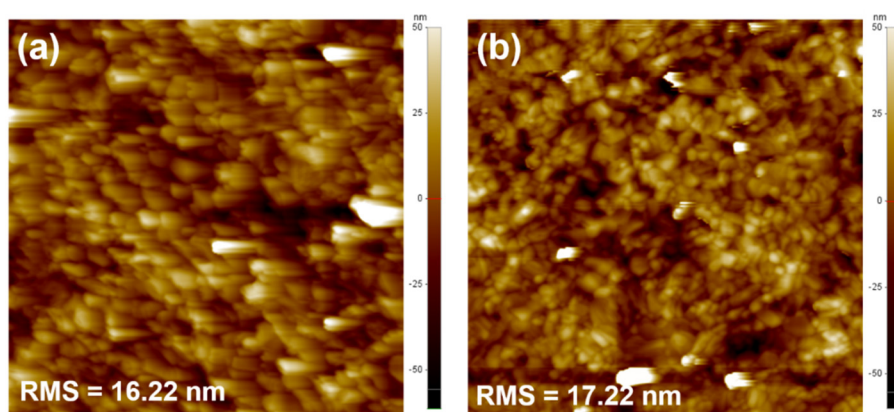

**Figure S11.** AFM height images (size:  $5\ \mu\text{m} \times 5\ \mu\text{m}$ ) of perovskite on (a) PFTPA and (b) PEDOT:PSS substrates.

SCLC

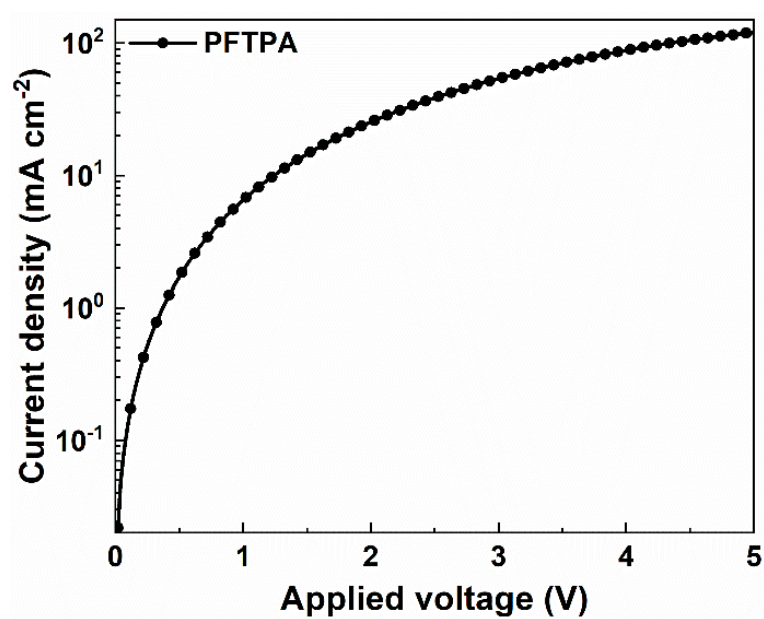

Figure S12. The  $J$ - $V$  curve of hole-only device based on PFTP.

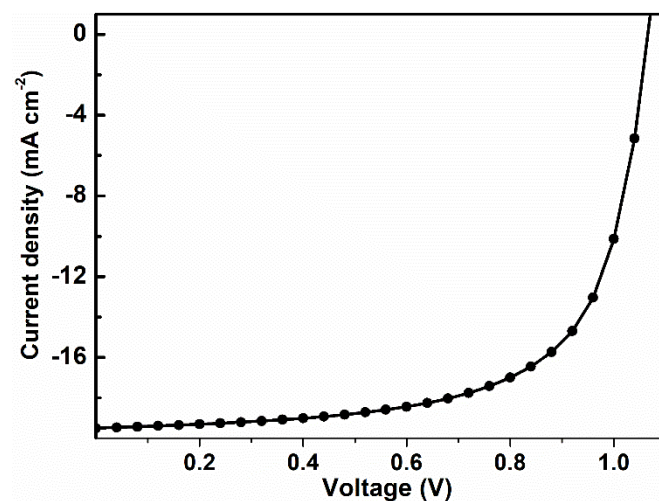

Figure S13. The  $J$ - $V$  curve of slot-die coated perovskite device based on PFTP.
